# Supplementary material
Source: PubMed Central journal article supplement (PMC2704152)

## SUPPLEMENTAL MATERIAL

**Figure S1.** Ectopic dynein activity in *she1Δ* cells can cause unequal distribution of spindle poles at the end of mitosis. **(A)** Images from a time-lapse video featuring a *she1Δ GFP-TUB1* cell undergoing anaphase. One spindle pole leaves the bud and enters the mother cell. At the end of the Video, both spindle poles reside in the same cell. Scale bar, 5 μm. **(B)** Analysis of Chr III distribution in wild-type and *she1Δ* cells arrested in G1 with alpha factor. Cells that have faithfully segregated their chromosomes and nuclei possess only one Chr III in G1, which appears as a single fluorescent dot per cell. *she1Δ* cells frequently display two Chr III's, indicating missegregation of chromosomes likely caused by spindle curling seen in **(A)**. Scale bar, 4 μm.

**Figure S2.** Loss of She1 has a modest impact on dynein localization. **(A)** Two-color images showing Dyn1-3GFP (green) and mCherry-Tub1 (red) localization in wild-type and *she1Δ* cells. Scale bar, 5 μm. **(B)** Percentage of cells with Dyn1-3GFP present at an astral MT plus end. Loss of She1 slightly enhances Dyn1-3GFP localization at the plus end, but the change is not statistically significant for pre-anaphase and anaphase cells.

**Figure S3.** Expression levels of tagged dynactin subunits. **(A)** Western blots of Nip100-3GFP, Arp1-3GFP, Jnm1-3GFP and Pgk1p as a control from asynchronous wild-type or *she1Δ* whole cell extracts. **(B)** Whole cell extract from a JNM1-3GFP/JNM1 diploid immunoblotted with anti-Jnm1p antibody. The 3GFP tag has little effect on Jnm1 stability or expression.

**Video S1.** Spindle positioning in a wild-type cell expressing GFP-Tub1.

**Video S2.** An oscillating spindle in a *she1Δ* cell expressing GFP-Tub1.

**Video S3.** Spindle elongation in a wild-type cell expressing GFP-Tub1.

**Video S4.** Spindle elongation in a *she1Δ* cell expressing GFP-Tub1.

**Video S5.** Spindle elongation in a *she1Δ* cell expressing GFP-Tub1. Note that the two spindle poles reside in the mother (on the right) at the end of the Video.

**Table S1.** aMT dynamics and lengths in wild-type and *she1Δ* cells.

| All values are mean $\pm$ standard deviation with sample number (n)                    |                     |                     |                |
|----------------------------------------------------------------------------------------|---------------------|---------------------|----------------|
|                                                                                        | <b>Wild-type</b>    | <i>she1Δ</i>        | <b>P value</b> |
| <b>aMT growth rate (<math>\mu\text{m}/\text{min}</math>)</b><br>(G1 & pre-anaphase)    | 1.37 $\pm$ 0.5 (15) | 1.46 $\pm$ 0.7 (13) | 0.69           |
| <b>aMT shrinkage rate (<math>\mu\text{m}/\text{min}</math>)</b><br>(G1 & pre-anaphase) | 2.54 $\pm$ 0.9 (21) | 2.34 $\pm$ 1.0 (20) | 0.49           |
| <b>Metaphase aMT length (<math>\mu\text{m}</math>)</b><br>( <i>cdc20</i> arrest)       | 2.10 $\pm$ 0.9 (18) | 2.00 $\pm$ 1.1 (23) | 0.76           |
| <b>Anaphase aMT length (<math>\mu\text{m}</math>)</b><br>( <i>cdc15</i> arrest)        | 3.56 $\pm$ 1.4 (44) | 4.18 $\pm$ 1.6 (29) | 0.11           |

Growth and shrinkage rates were determined by measuring the length of an aMT every 10 s in living cells expressing GFP-Tub1. aMT lengths were determined using indirect immunofluorescent labeling of endogenous alpha tubulin in fixed cells. Haploid cells contained either a *cdc20-3* or *cdc15-2* allele and were arrested in metaphase or anaphase, respectively, by incubating at 37° C for 2 hours.

**Table S2.** Yeast Strains and Plasmids.

| Yeast strains |                                 |                                                                                                                                                                                                   |                     |
|---------------|---------------------------------|---------------------------------------------------------------------------------------------------------------------------------------------------------------------------------------------------|---------------------|
| Strain name   |                                 | genotype                                                                                                                                                                                          | source              |
| JBY 1         | <i>MAT<math>\alpha</math></i>   | <i>she1<math>\Delta</math>::LEU2 leu2-3,112 lys2-801 his3<math>\Delta</math>200 ura3-52</i>                                                                                                       | this study          |
| JBY 65        | <i>MATa</i>                     | <i>SPC42-mCherry::KanMX SHE1-3GFP::HIS3 leu2-3,112 lys2-801 his3<math>\Delta</math>200 ura3-52</i>                                                                                                | this study          |
| JBY 39        | <i>MATa</i>                     | <i>ura3-52::GFP-TUB1::URA3 leu2-3,112 lys2-801 his3<math>\Delta</math>200</i>                                                                                                                     | this study          |
| JBY 70        | <i>MATa</i>                     | <i>ura3-52::GFP-TUB1::URA3 she1<math>\Delta</math>::LEU2 dyn1<math>\Delta</math>::KanMX leu2-3,112 lys2-801 his3<math>\Delta</math>200</i>                                                        | this study          |
| JBY 75        | <i>MATa</i>                     | <i>ura3-52::GFP-TUB1::URA3 she1<math>\Delta</math>::LEU2 kar9<math>\Delta</math>::KanMX leu2-3,112 lys2-801 his3<math>\Delta</math>200</i>                                                        | this study          |
| JBY 89        | <i>MATa</i>                     | <i>DYN1-3GFP::HIS3 pHIS::mCherry-TUB1::URA3 leu2-3,112 lys2-801 his3<math>\Delta</math>200 ura3-52</i>                                                                                            | this study          |
| JBY 87        | <i>MAT<math>\alpha</math></i>   | <i>DYN1-3GFP::HIS3 pHIS::mCherry-TUB1::URA3 she1<math>\Delta</math>::LEU2 leu2-3,112 lys2-801 his3<math>\Delta</math>200 ura3-52</i>                                                              | this study          |
| JBY 98        | <i>MATa</i>                     | <i>NIP100-3GFP::HIS3 she1<math>\Delta</math>::LEU2 leu2-3,112 lys2-801 his3<math>\Delta</math>200 ura3-52</i>                                                                                     | this study          |
| JBY 100       | <i>MAT<math>\alpha</math></i>   | <i>NIP100-3GFP::HIS3 leu2-3,112 lys2-801 his3<math>\Delta</math>200 ura3-52</i>                                                                                                                   | this study          |
| JBY 102       | <i>MATa</i>                     | <i>ARP1-3GFP::HIS3 she1<math>\Delta</math>::LEU2 leu2-3,112 lys2-801 his3<math>\Delta</math>200 ura3-52</i>                                                                                       | this study          |
| JBY 104       | <i>MATa</i>                     | <i>ARP1-3GFP::HIS3 leu2-3,112 lys2-801 his3<math>\Delta</math>200 ura3-52</i>                                                                                                                     | this study          |
| JBY 106       | <i>MATa</i>                     | <i>JNM1-3GFP::HIS3 she1<math>\Delta</math>::LEU2 leu2-3,112 lys2-801 his3<math>\Delta</math>200 ura3-52</i>                                                                                       | this study          |
| JBY 108       | <i>MATa</i>                     | <i>JNM1-3GFP::HIS3 leu2-3,112 lys2-801 his3<math>\Delta</math>200 ura3-52</i>                                                                                                                     | this study          |
| JBY 117       | <i>MATa/<math>\alpha</math></i> | <i>ura3-52::pHIS::mCherry-TUB1::URA3/ura3-52; NIP100-3GFP::HIS3/NIP100-3GFP::HIS3; she1<math>\Delta</math>::LEU2/she1<math>\Delta</math>::LEU2 leu2-3,112 lys2-801 his3<math>\Delta</math>200</i> | this study          |
| JBY 118       | <i>MATa/<math>\alpha</math></i> | <i>ura3-52::pHIS::mCherry-TUB1::URA3/ura3-52; NIP100-3GFP::HIS3/NIP100-3GFP::HIS3 leu2-3,112 lys2-801 his3<math>\Delta</math>200</i>                                                              | this study          |
| JBY 119       | <i>MATa/<math>\alpha</math></i> | <i>ura3-52::pHIS::mCherry-TUB1::URA3/ura3-52; ARP1-3GFP::HIS3/ARP1-3GFP::HIS3; she1<math>\Delta</math>::LEU2/she1<math>\Delta</math>::LEU2 leu2-3,112 lys2-801 his3<math>\Delta</math>200</i>     | this study          |
| JBY 120       | <i>MATa/<math>\alpha</math></i> | <i>ura3-52::pHIS::mCherry-TUB1::URA3/ura3-52; ARP1-3GFP::HIS3/ARP1-3GFP::HIS3 leu2-3,112 lys2-801 his3<math>\Delta</math>200</i>                                                                  | this study          |
| JBY 121       | <i>MATa/<math>\alpha</math></i> | <i>ura3-52::pHIS::mCherry-TUB1::URA3/ura3-52; JNM1-3GFP::HIS3/JNM1-3GFP::HIS3; she1<math>\Delta</math>::LEU2/she1<math>\Delta</math>::LEU2 leu2-3,112 lys2-801 his3<math>\Delta</math>200</i>     | this study          |
| JBY 122       | <i>MATa/<math>\alpha</math></i> | <i>pHIS::mCherry-TUB1::URA3/ura3-52; JNM1-3GFP::HIS3/JNM1-3GFP::HIS3</i>                                                                                                                          | this study          |
| JBY 57        | <i>MAT<math>\alpha</math></i>   | <i>she1<math>\Delta</math>::LEU2 ura3-52::GFP-TUB1::URA3 leu2-3,112 lys2-801 his3<math>\Delta</math>200</i>                                                                                       | this study          |
| JBY 10        | <i>MAT<math>\alpha</math></i>   | <i>she1<math>\Delta</math>::LEU2 HIS3::pCu-LacI-GFP leu2-3,112::lacO::LEU2 leu2-3,112 lys2-801 his3<math>\Delta</math>200 ura3-52</i>                                                             | this study          |
| JBY 16        | <i>MATa</i>                     | <i>HIS3::pCu-LacI-GFP leu2-3,112::lacO::LEU2 leu2-3,112 lys2-801 his3<math>\Delta</math>200 ura3-52</i>                                                                                           | this study          |
| JBY 136       | <i>MAT<math>\alpha</math></i>   | <i>dyn1<math>\Delta</math>::KanMX his3<math>\Delta</math>1 leu2<math>\Delta</math>0 lys2<math>\Delta</math>0 ura3<math>\Delta</math>0</i>                                                         | Res. Gen Collection |
| JBY 137       | <i>MAT<math>\alpha</math></i>   | <i>kar9<math>\Delta</math>::KanMX his3<math>\Delta</math>1 leu2<math>\Delta</math>0 lys2<math>\Delta</math>0 ura3<math>\Delta</math>0</i>                                                         | Res. Gen Collection |

|                 |               |                                                                                                                                        |                          |
|-----------------|---------------|----------------------------------------------------------------------------------------------------------------------------------------|--------------------------|
| JBY 131         | <i>MATa</i>   | <i>JNM1-tdtomato::KanMX NIP100-3GFP::HIS3 LEU2 leu2-3,112 lys2-801 his3Δ200 ura3-52</i>                                                | this study               |
| JBY 178         | <i>MATa</i>   | <i>JNM1-3HA::HIS3 NIP100-3GFP::HIS3 LEU2 leu2-3,112 lys2-801 his3Δ200 ura3-52</i>                                                      | this study               |
| JBY 180         | <i>MATa/α</i> | <i>dyn1Δ::KanMX/dyn1(ko)::KanMX pHIS::mCherry-TUB1::URA3/ura3-52; NIP100-3GFP::HIS3/NIP100-3GFP::HIS3; she1Δ::LEU2/she1(KO)::LEU2</i>  | this study               |
| JBY 181         | <i>MATa/α</i> | <i>dyn1Δ::KanMX/dyn1Δ::KanMX pHIS::mCherry-TUB1::URA3/ura3-52; NIP100-3GFP::HIS3/NIP100-3GFP::HIS3</i>                                 | this study               |
| JBY 184         | <i>MATa</i>   | <i>SHE1-GFP::HIS3 pHIS::mCherry-TUB1::URA3 leu2-3,112 lys2-801 his3Δ200 ura3-52</i>                                                    | this study               |
| JBY 213         | <i>MATa/α</i> | <i>LDB18-3GFP::HIS3/LDB18-3GFP::HIS3; pHIS::mCherry-TUB1::URA3/ura3-52 leu2-3,112 lys2-801 his3Δ200</i>                                | this study               |
| JBY 214         | <i>MATa/α</i> | <i>LDB18-3GFP::HIS3/LDB18-3GFP::HIS3; pHIS::mCherry-TUB1::URA3/ura3-52; she1(KO)::LEU2/she1(KO)::LEU2 leu2-3,112 lys2-801 his3Δ200</i> | this study               |
| JBY 175         | <i>MATa/α</i> | <i>pHIS::mCherry-TUB1::URA3/+; JNM1-3GFP::HIS3/+ LEU2 leu2-3,112 lys2-801 his3Δ200</i>                                                 | this study               |
| <b>Plasmids</b> |               |                                                                                                                                        |                          |
| Plasmid name    |               |                                                                                                                                        | source                   |
| pAK011          |               | pRS306-mCherry-TUB1                                                                                                                    | Khmelinskii et al., 2007 |
| pYS47           |               | 3GFP::HIS3                                                                                                                             | Wong et al., 2007        |
|                 |               | PFA6a::tdTomato::KanMX                                                                                                                 | Shaner et al., 2004      |

# Figure-S1 (Barnes)

## A *she1* $\Delta$ TUB1-GFP

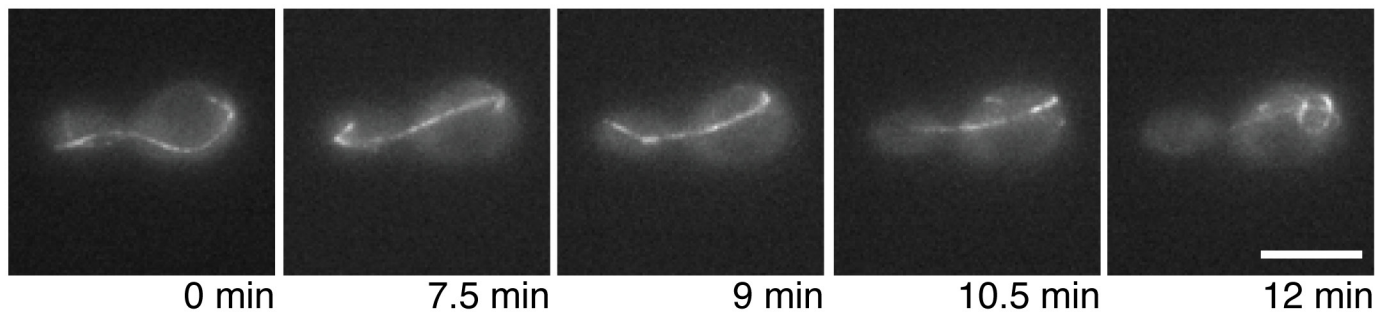

## B

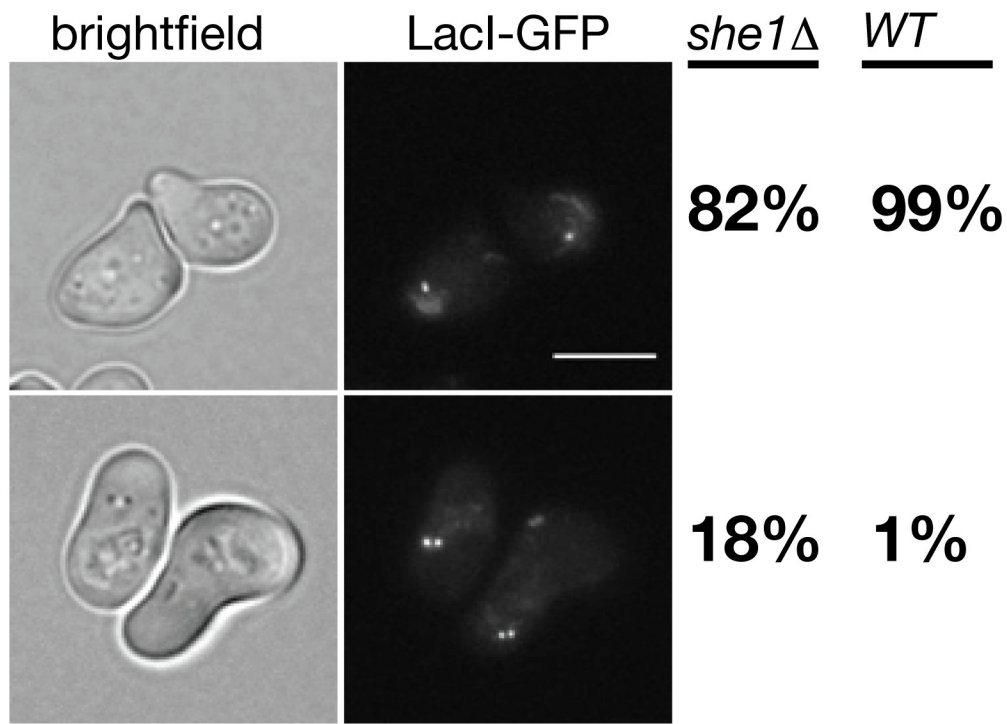

# Figure-S2(Barnes)

**A**

Dyn1-3GFP  
mCherry-Tub1

WT

*she1* $\Delta$ 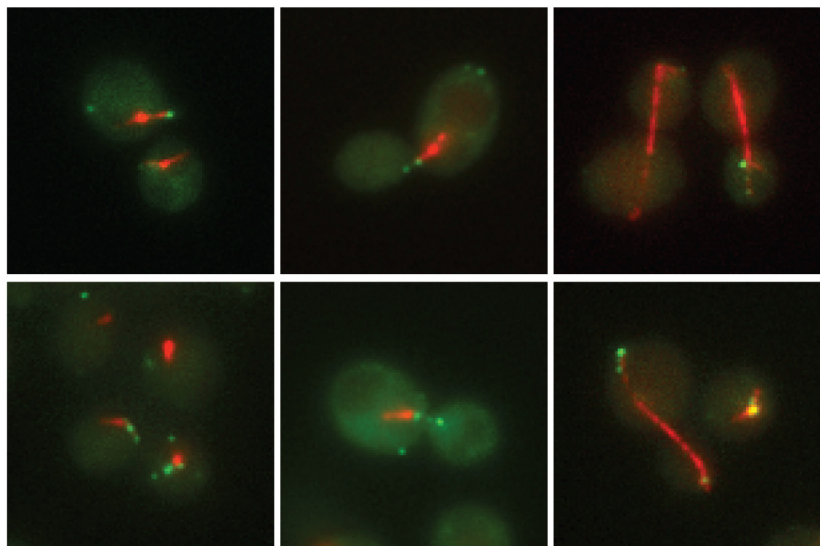**B**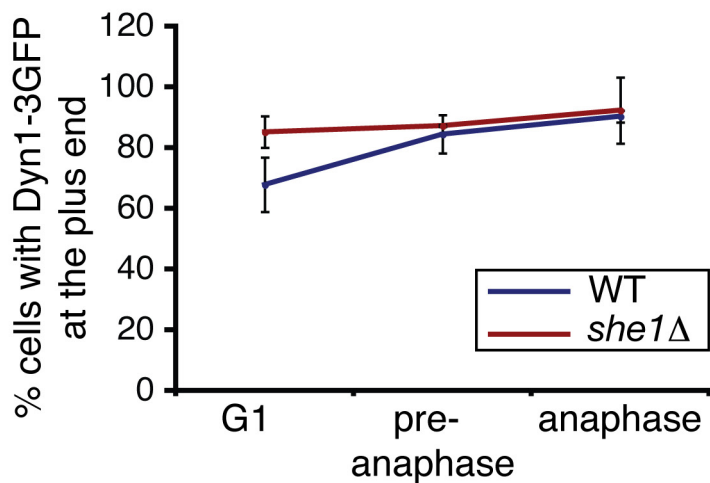

# Figure-S3(Barnes)

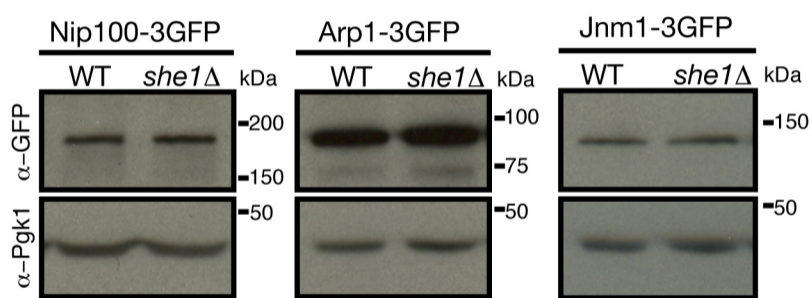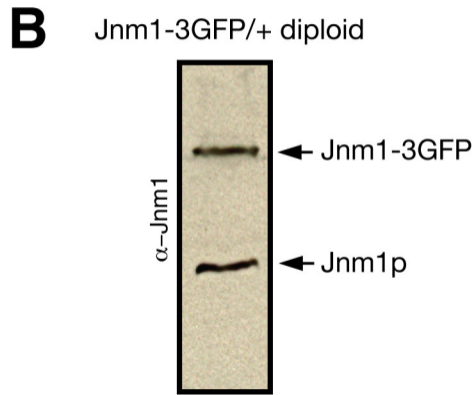

Supplement: E09-03-0186_1.pdf [file E09-03-0186_1.pdf]
